# Supplementary material for: The Nutritional and Health Effects of the COVID-19 Pandemic on Patients with Diabetes Mellitus
Source: MDPI journal article supplement (doi:10.3390/nu12103013), 2020-09-30
Supplement: s1 [file s1]

# The Nutritional and Health Effects of the COVID-19 Pandemic on Patients with Diabetes Mellitus

Monika Grabia \*, Renata Markiewicz-Żukowska, Anna Puścion-Jakubik, Joanna Bielecka, Patryk Nowakowski, Krystyna Gromkowska-Kępa, Konrad Mielcarek and Katarzyna Socha

Department of Bromatology, Medical University of Białystok, Mickiewicza 2D St., 15-222 Białystok, Poland; monika.grabia@umb.edu.pl (M.G.); renmar@poczta.onet.pl (R.M.Ż); anna.puscion-jakubik@umb.edu.pl (A.P.J.); joanna.bielecka@umb.edu.pl (J.B.); patryk.nowakowski@umb.edu.pl (P.N.); krystyna.gromkowska.kepka@gmail.com (K.G.K.), konrad.mielcarek@umb.edu.pl (K.M.); katarzyna.socha@umb.edu.pl (K.S.)

\* Correspondence: monika.grabia@umb.edu.pl; Tel.: +48-85-748-5469

Received: 16 August 2020; Accepted: 28 September 2020; Published: date

**Table S1.** Characteristics of the subgroups, type of physical activity before and during the COVID-19 pandemic.

| Type of activity | Before/During the COVID-19 Pandemic |                           |                         |                           |                           |                        |
|------------------|-------------------------------------|---------------------------|-------------------------|---------------------------|---------------------------|------------------------|
|                  | T1DM                                |                           |                         | T2DM                      |                           |                        |
|                  | Total<br>( <i>n</i> = 90)           | Women<br>( <i>n</i> = 75) | Men<br>( <i>n</i> = 15) | Total<br>( <i>n</i> = 34) | Women<br>( <i>n</i> = 28) | Men<br>( <i>n</i> = 6) |
| Cycling          | 51%/55%                             | 48%/52%                   | 67%/67%                 | 27%/44%**                 | 14%/43%***                | 83%/67%                |
| Dancing          | 19%/8%*                             | 17%/9%                    | 40%/ -                  | 26%/3%***                 | 21%/4%***                 | 50%/ -                 |
| Fitness          | 26%/11%**                           | 26%/23%                   | 27%/13%**               | 18%/18%                   | 18%/18%                   | 17%/17%                |
| Gym              | 52%/27%***                          | 53%/27%***                | 53%/33%***              | 18%/35%**                 | 17%/50%***                | 18%/32%                |
| Gymnastic        | 43%/32%                             | 43%/36%                   | 47%/13%***              | 50%/12%***                | 50%/14%***                | 50%/ -                 |
| Running          | 42%/35%                             | 35%/35%                   | 80%/40%***              | 36%/36%                   | 25%/32%                   | 83%/50%                |
| Swimming         | 31%/10%***                          | 28%/12%***                | 47%/ -                  | 21%/15%                   | 14%/18%                   | 50%/ -                 |
| Walking          | 68%/88%***                          | 55%/81%***                | 73%/87%**               | 51%/89%***                | 50%/89%***                | 50%/83%                |

Abbreviations: Type 1 diabetes mellitus (T1DM) and type 2 diabetes mellitus (T2DM). Differences between “before” and “during” the COVID-19 period were evaluated by the Chi-square test (\*  $p < 0.05$ , \*\*  $p < 0.01$ , \*\*\*  $p < 0.001$ ).

**Table S2.** Characteristics of the subgroups, healthy/regularity of meal consumption during the COVID-19 pandemic.

| Regularity                             | Total<br>(n = 124) | T1DM               |                   |                 | T2DM               |                   |                |
|----------------------------------------|--------------------|--------------------|-------------------|-----------------|--------------------|-------------------|----------------|
|                                        |                    | Total*<br>(n = 90) | Women<br>(n = 75) | Men<br>(n = 15) | Total*<br>(n = 34) | Women<br>(n = 28) | Men<br>(n = 6) |
| <b>Healthy eating</b>                  |                    |                    |                   |                 |                    |                   |                |
| Yes                                    | 40%                | 40%                | 39%               | 47%             | 38%                | 43%               | 17%            |
| No                                     | 60%                | 60%                | 61%               | 53%             | 62%                | 57%               | 83%            |
| <b>Regularity of meal consumption*</b> |                    |                    |                   |                 |                    |                   |                |
| No regularity                          | 35%                | 29%                | 30%               | 27%             | 50%                | 53%               | 33%            |
| Main meals only                        | 40%                | 42%                | 45%               | 27%             | 35%                | 29%               | 67%            |
| Most meals                             | 25%                | 29%                | 25%               | 46%             | 15%                | 18%               | -              |

Abbreviations: Type 1 diabetes mellitus (T1DM) and type 2 diabetes mellitus (T2DM). \* Statistically significant ( $p < 0.01$ ) relationship between total T1DM vs. total T2DM were evaluated by the Chi-square test.

**Table S3.** Characteristics of the subgroups, variation in food intake during the COVID-19 pandemic.

| Products         | Total<br>(n = 124) | Increased Intake/Decreased Intake |                 |                   |                |
|------------------|--------------------|-----------------------------------|-----------------|-------------------|----------------|
|                  |                    | T1DM (n = 90)                     |                 | T2DM (n = 34)     |                |
|                  |                    | Women<br>(n = 75)                 | Men<br>(n = 15) | Women<br>(n = 28) | Men<br>(n = 6) |
| <b>Coffee</b>    | 30%/13%            | 25%/15%                           | 53%/ -          | 25%/14%           | 50%/17%        |
| Convenience food | 16%/29%            | 12%/36%                           | 20%/13%         | 29%/18%           | - /33%         |
| Dairy products   | 30%/12%            | 31%/11%                           | 40%/13%         | 22%/11%           | 33%/33%        |
| Delivery meals   | 10%/26%            | 12%/27%                           | 7%/27%          | - /33%            | 7%/22%         |
| Eggs             | 35%/8%             | 28%/9%                            | 60%/ -          | 29%/11%           | 83%/ -         |
| Energy drinks    | 13%/15%            | 16%/19%                           | 7%/ -           | 7%/7%             | 17%/50%        |
| Fast food        | 14%/32%            | 17%/37%                           | 13%/27%         | 14%/14%           | - /67%         |
| Fresh bread      | 24%/18%            | 25%/16%                           | 27%/40%         | 18%/14%           | 33%/ -         |
| Fresh fish       | 22%/14%            | 19%/13%                           | 53%/ -          | 18%/18%           | - /33%         |
| Fresh fruits     | 44%/15%            | 45%/16%                           | 73%/13%         | 25%/14%           | 50%/17%        |
| Fresh vegetables | 40%/11%            | 41%/9%                            | 60%/13%         | 29%/7%            | 33%/33%        |
| Grain products   | 37%/13%            | 40%/16%                           | 40%/13%         | 29%/7%            | 33%/ -         |
| Homemade bread   | 31%/ 6%            | 25%/5%                            | 73%/7%          | 22%/11%           | 33%/ -         |
| Nuts             | 23%/11%            | 25%/13%                           | 13%/13%         | 14%/7%            | 50%/ -         |
| Red meat         | 15%/22%            | 11%/23%                           | 27%/40%         | 18%/14%           | 33%/ -         |
| Salty snacks     | 19%/29%            | 27%/32%                           | 20%/7%          | 7%/36%            | 17%/17%        |
| Water            | 48%/1%             | 52%/ -                            | 60%/ -          | 36%/4%            | 33%/ -         |
| White meat       | 27%/15%            | 27 /12%                           | 60%/7%          | 11%/29%           | 33%/ -         |

Abbreviations: Type 1 diabetes mellitus (T1DM) and type 2 diabetes mellitus (T2DM).

**Table S4.** Characteristics of the subgroups, frequency of hand washing/antibacterial agent use before and during the COVID-19 pandemic.

|                                | Before/During the COVID-19 Pandemic |                   |                   |                 |                   |                   |                |
|--------------------------------|-------------------------------------|-------------------|-------------------|-----------------|-------------------|-------------------|----------------|
|                                | Total<br>(n = 124)                  | T1DM              |                   |                 | T2DM              |                   |                |
|                                |                                     | Total<br>(n = 90) | Women<br>(n = 75) | Men<br>(n = 15) | Total<br>(n = 34) | Women<br>(n = 28) | Men<br>(n = 6) |
| After leaving shops            | 47%<br>/91%**                       | 48%/<br>90%**     | 47%/<br>91%**     | 54%/<br>87%**   | 44%/<br>94%**     | 43%/<br>93%**     | 50%/<br>100%   |
| After leaving public transport | 52%/<br>89%**                       | 57%/<br>87%**     | 53%/<br>87%**     | 73%/<br>87%*    | 38%/<br>94%**     | 36%/<br>93%**     | 50%/<br>100%   |
| After contact to animals       | 79%/<br>81%                         | 77%/<br>81%       | 75%/<br>80%       | 86%/<br>86%     | 85%/<br>82%       | 89%/<br>86%       | 67%/<br>67%    |
| Before cooking                 | 90%/<br>86%                         | 90%/<br>88%       | 92%/<br>87%       | 80%/<br>93%     | 91%/<br>82%       | 89%/<br>82%       | 100%/<br>83%   |
| After WC                       | 90%/<br>90%                         | 91%/<br>92%       | 91%/<br>93%       | 93%/<br>87%     | 88%/<br>82%       | 93%/<br>86%       | 67%/<br>67%    |
| After coming home              | 75%/<br>91%*                        | 73%/<br>89%*      | 73%/<br>92%*      | 73%/<br>73%     | 79%/<br>87%*      | 82%/<br>97%*      | 67%/<br>100%   |

Abbreviations: Type 1 diabetes mellitus (T1DM) and type 2 diabetes mellitus (T2DM). Differences between “before” and “during” the COVID-19 period were evaluated by the Chi-square test (\*  $p < 0.01$  and \*\*  $p < 0.001$ ).

**Table S5.** Characteristics of the subgroups, duration of screen time before and during the COVID-19 pandemic.

| Duration of activity | Before/During the COVID-19 Pandemic |                    |                    |                 |                    |                    |                |
|----------------------|-------------------------------------|--------------------|--------------------|-----------------|--------------------|--------------------|----------------|
|                      | Total*<br>(n = 124)                 | T1DM               |                    |                 | T2DM               |                    |                |
|                      |                                     | Total*<br>(n = 90) | Women*<br>(n = 75) | Men<br>(n = 15) | Total*<br>(n = 34) | Women*<br>(n = 28) | Men<br>(n = 6) |
| < 2 h                | 22%/5%                              | 20%/6%             | 17 %/4%            | 33%/13%         | 29%/6%             | 36%/ 7%            | - / -          |
| 2–4 h                | 43%/17%                             | 46%/13%            | 48%/15%            | 33%/7%          | 35%/26%            | 29%/29%            | 68%/16%        |
| 5–7 h                | 27%/43%                             | 29%/49%            | 29%/49%            | 27%/47%         | 21%/26%            | 22%/29%            | 16%/16%        |
| ≥8 h                 | 8%/35%                              | 5%/32%             | 6%/32%             | 7%/33%          | 15%/42%            | 13%/35%            | 16%/68%        |

Abbreviations: Type 1 diabetes mellitus (T1DM) and type 2 diabetes mellitus (T2DM). Differences between “before” and “during” the COVID-19 period were evaluated by the Chi-square test (\*  $p < 0.001$ ).

**Table S6.** Characteristics of the subgroups, sleep length before and during the COVID-19 pandemic.

| Sleep length | Before/During the COVID-19 Pandemic |                     |                     |                 |                    |                    |                |
|--------------|-------------------------------------|---------------------|---------------------|-----------------|--------------------|--------------------|----------------|
|              | Total*<br>(n = 124)                 | T1DM                |                     |                 | T2DM               |                    |                |
|              |                                     | Total**<br>(n = 90) | Women**<br>(n = 75) | Men<br>(n = 15) | Total*<br>(n = 34) | Women*<br>(n = 28) | Men<br>(n = 6) |
| <5 h         | 10%/4%                              | 12%/2%              | 15%/3%              | - / -           | 6%/9%              | 4%/10%             | 16%/ -         |
| 5–8 h        | 73%/51%                             | 70%/48%             | 69%/48%             | 73%/47%         | 79%/59%            | 82%/61%            | 67%/50%        |
| ≥8 h         | 17%/45%                             | 18%/50%             | 16%/49%             | 27%/53%         | 15%/32%            | 14%/29%            | 17%/50%        |

Abbreviations: Type 1 diabetes mellitus (T1DM) and type 2 diabetes mellitus (T2DM). Differences between “before” and “during” the COVID-19 period were evaluated by the Chi-square test (\*  $p < 0.01$  and \*\*  $p < 0.001$ ).

**Table S7.** Characteristics of the subgroups, stress level distribution before, at the beginning of the pandemic and at the time of survey completion.

| Level of stress                        | Before the COVID-19 pandemic |                    |                  |                   |                |
|----------------------------------------|------------------------------|--------------------|------------------|-------------------|----------------|
|                                        | Total*<br>(n = 124)          | T1DM (n = 90)      |                  | T2DM (n = 34)     |                |
|                                        |                              | Women<br>(n = 75)* | Men<br>(n = 15)* | Women<br>(n = 28) | Men<br>(n = 6) |
| Low                                    | 52%                          | 47%                | 47%              | 58%               | 57%            |
| Medium                                 | 34%                          | 36%                | 53%              | 18%               | 33%            |
| High                                   | 14%                          | 17%                | -                | 14%               | -              |
| Very high                              | -                            | -                  | -                | -                 | -              |
| At the beginning the COVID-19 pandemic |                              |                    |                  |                   |                |
| Low                                    | 9%                           | 7%                 | 20%              | 10%               | -              |
| Medium                                 | 30%                          | 25%                | 60%              | 29%               | 17%            |
| High                                   | 29%                          | 28%                | 7%               | 36%               | 66%            |
| Very high                              | 32%                          | 40%                | 13%              | 25%               | 17%            |
| Currently                              |                              |                    |                  |                   |                |
| Low                                    | 39%                          | 33%                | 47%              | 50%               | 33%            |
| Medium                                 | 40%                          | 39%                | 40%              | 43%               | 50%            |
| High                                   | 17%                          | 24%                | -                | 7%                | 17%            |
| Very high                              | 4%                           | 4%                 | 13%              | -                 | -              |

Abbreviations: Type 1 diabetes mellitus (T1DM) and type 2 diabetes mellitus (T2DM). \* Statistically ( $p < 0.001$ ) significant differences were observed in stress levels before, at the beginning of the COVID-19 pandemic and at the time of completing the questionnaire.

**Table S8.** Frequency of physical activity before and during the COVID-19 pandemic in children population.

| Weekly activity | Before/During the COVID-19 Pandemic |         |
|-----------------|-------------------------------------|---------|
|                 | Total (n = 35)                      | p-value |
| No activity     | 12%/26%                             | 0.001   |
| 1–2 times/week  | 34%/43%                             |         |
| 3–4 times/week  | 34%/26%                             |         |
| ≥5 times/week   | 20%/5%                              |         |

Differences between “before” and “during” the COVID-19 period were evaluated by the Chi-square test.

**Table S9.** Number of meals per day in children before and during the COVID-19 pandemic.

| Number of meals | Before/During the COVID-19 Pandemic |                 |
|-----------------|-------------------------------------|-----------------|
|                 | Total ( <i>n</i> = 35)              | <i>p</i> -value |
| 1–2 meals/day   | 51%/6%                              | NS              |
| 3–4 meals/day   | - /54%                              |                 |
| ≥5 meals/day    | 49%/40%                             |                 |

Differences between “before” and “during” the COVID-19 period were evaluated by the Chi-square test (NS, non-significant,  $p > 0.05$ ).

**Table S10.** Variation in food intake during the COVID-19 pandemic in children population.

| Products         | Increased intake | Decreased intake |
|------------------|------------------|------------------|
| Convenience food | 23%              | 40%              |
| Dairy products   | 43%              | 20%              |
| Delivery meals   | 9%               | 17%              |
| Eggs             | 40%              | 6%               |
| Energy drinks    | 26%              | 11%              |
| Fast food        | 20%              | 29%              |
| Fresh bread      | 49%              | 17%              |
| Fresh fish       | 31%              | 17%              |
| Fresh fruits     | 49%              | 17%              |
| Fresh vegetables | 49%              | 14%              |
| Grain products   | 49%              | 23%              |
| Homemade bread   | 34%              | 11%              |
| Nuts             | 20%              | 14%              |
| Red meat         | 40%              | 11%              |
| Salty snacks     | 23%              | 26%              |
| Water            | 71%              | -                |
| White meat       | 29%              | 14%              |

**Table S11.** Frequency of hand washing/antibacterial agent use before and during the COVID-19 pandemic in children population.

|                                | Before/During the COVID-19 Pandemic |                 |
|--------------------------------|-------------------------------------|-----------------|
|                                | Total ( <i>n</i> = 35)              | <i>p</i> -value |
| After leaving shops            | 60%/92%                             | 0.001           |
| After leaving public transport | 69%/86%                             | 0.01            |
| After contact to animals       | 71%/77%                             | NS              |
| Before cooking                 | 91%/86%                             | NS              |
| After WC                       | 92%/92%                             | NS              |
| After coming home              | 77%/86%                             | NS              |

Differences between “before” and “during” the COVID-19 period were evaluated by the Chi-square test (NS, non-significant,  $p > 0.05$ ).

**Table S12.** Stress level distribution before, at the beginning of the pandemic and at the time of survey completion in children population.

| <b>Level of stress</b> | <b>Before</b> | <b>At the beginning</b> | <b>Current</b> | <b><i>p</i>-value</b> |
|------------------------|---------------|-------------------------|----------------|-----------------------|
| Low                    | 20%           | 14%                     | 43%            | 0.02                  |
| Medium                 | 34%           | 46%                     | 37%            |                       |
| High                   | 34%           | 17%                     | 14%            |                       |
| Very high              | 12%           | 23%                     | 16%            |                       |

Differences between “before”, “at the beginning” and “current” the COVID-19 period were evaluated by the Chi-square test.
